# Supplementary material
Source: PubMed Central journal article supplement (PMC9580356)
Supplement: jcm.02210-21-s0001.pdf [file jcm.02210-21-s0001.pdf]

Supplemental Table 1. Antibiogram With Antimicrobial Agents Listed Alphabetically: Gram-Negative Isolates

Memorial Medical Center  
1 January - 31 December 2020 Antibiogram<sup>a</sup>  
Percent Susceptible

| Organism                                                           | Number of Strains | Amikacin | Ampicillin | Cefazolin (systemic <sup>b</sup> ) | Cefazolin (urine <sup>c</sup> ) | Cefepime | Ceftriaxone | Ceftazidime | Ciprofloxacin | Ertapenem | Gentamicin | Meropenem | Piperacillin-tazobactam | Trimethoprim-sulfamethoxazole | Tobramycin |
|--------------------------------------------------------------------|-------------------|----------|------------|------------------------------------|---------------------------------|----------|-------------|-------------|---------------|-----------|------------|-----------|-------------------------|-------------------------------|------------|
| <i>Acinetobacter baumannii</i>                                     | 32                | 60       | R          | R                                  | R                               | 33       | 34          | 42          | 41            | R         | 57         | 60        | 46                      | 48                            | 59         |
| <i>Citrobacter freundii</i>                                        | 49                | 100      | R          | R                                  | R                               | 81       | 72          | 67          | 90            | 98        | 96         | 99        | 83                      | 67                            | 97         |
| <i>Enterobacter cloacae</i>                                        | 76                | 99       | R          | R                                  | R                               | 78       | 61          | 62          | 92            | 89        | 90         | 99        | 77                      | 84                            | 90         |
| <i>Escherichia coli</i>                                            | 1433              | 99       | 35         | 68                                 | 87                              | 92       | 93          | 90          | 72            | 99        | 91         | 99        | 94                      | 73                            | 92         |
| <i>Klebsiella</i> (formerly <i>Enterobacter</i> ) <i>aerogenes</i> | 31                | 100      | R          | R                                  | R                               | 81       | 68          | 60          | 92            | 99        | 91         | 99        | 74                      | 95                            | 91         |
| <i>Klebsiella pneumoniae</i>                                       | 543               | 99       | R          | 72                                 | 89                              | 93       | 91          | 87          | 84            | 99        | 94         | 95        | 86                      | 81                            | 94         |
| <i>Morganella morganii</i>                                         | 44                | 100      | R          | R                                  | R                               | 94       | 85          | 81          | 89            | 98        | 100        | 99        | 96                      | 75                            | 100        |
| <i>Proteus mirabilis</i>                                           | 88                | 100      | 87         | 80                                 | 92                              | 99       | 99          | 92          | 79            | 100       | 90         | 100       | 70                      | 73                            | 93         |
| <i>Pseudomonas aeruginosa</i>                                      | 397               | 97       | R          | R                                  | R                               | 88       | R           | 86          | 75            | R         | 80         | 80        | 85                      | R                             | 83         |
| <i>Salmonella</i> spp.                                             | 32                | -        | 88         | -                                  | -                               | 98       | 97          | 97          | 90            | 100       | -          | 100       | 91                      | 86                            | -          |
| <i>Serratia marcescens</i>                                         | 50                | 100      | R          | R                                  | R                               | 95       | 87          | 80          | 95            | 99        | 94         | 99        | 94                      | 91                            | 89         |
| <i>Shigella</i> spp.                                               | 33                | -        | 64         | -                                  | -                               | 98       | 98          | 96          | 90            | 100       | -          | 100       | 91                      | 69                            | -          |
| <i>Stenotrophomonas maltophilia</i>                                | 72                | R        | R          | R                                  | R                               | -        | R           | 63          | 6             | R         | R          | R         | -                       | 98                            | R          |

Abbreviation: R, intrinsic resistance.

Symbol: -, drug not tested or drug not indicated.

<sup>a</sup> The percent susceptible for each organism/antimicrobial agent combination was generated by including the first isolate of that organism encountered in a given patient.

<sup>b</sup> Cefazolin (systemic) refers to application of susceptibility breakpoint minimal inhibitory concentration (MIC)  $\leq 2$   $\mu\text{g/mL}$  and applies to the treatment of patients with infections other than uncomplicated urinary tract infections (UTIs).

<sup>c</sup> Cefazolin (urine) refers to application of urinary susceptibility breakpoint MIC  $\leq 16$   $\mu\text{g/mL}$  (using a cefazolin dosage regimen of 1 g intravenously [IV] every 12 hours) and can be used to predict susceptibility for oral cefaclor, cefdinir, cefpodoxime, cefprozil, cefuroxime, cephalixin, and loracarbef when used for therapy of uncomplicated UTIs due to *E. coli*, *K. pneumoniae*, and *P. mirabilis*. Cefazolin as a surrogate may overcall resistance to cefdinir, cefpodoxime, and cefuroxime. If cefazolin tests resistant, these drugs should be tested individually if needed for therapy.
